# Supplementary material for: Nanocarriers from dicationic bis-imidazolium amphiphiles and their interaction with anionic drugs
Source: Royal Society of Chemistry journal article supplement (doi:10.1039/c3tb20289e), 2013-01-01
Supplement: c3tb20289e.pdf [file c3tb20289e.pdf]

## Electronic Supplementary Information

# Nanocarriers from dicationic *bis*-imidazolium amphiphiles and their interaction with anionic drugs

Lucía Casal-Dujat,<sup>a,b</sup> Peter C. Griffiths,<sup>\*c</sup> Carlos Rodriguez-Abreu,<sup>d</sup> Conxita Solans,<sup>e</sup> Sarah Rogers,<sup>f</sup> and Lluïsa Pérez-García<sup>\*a</sup>

### Characterization of **1**

$^1\text{H}$  NMR: Varian Gemini 300 (300 MHz).  $^{13}\text{C}$  NMR: Varian Gemini 400 (100 MHz). NMR spectra were determined in  $\text{CDCl}_3$  and the chemical shifts are expressed in parts per million (ppm) relative to the central peak of the solvent. Thin Layer Chromatography (TLC) was performed on Merck coated 60 F<sub>254</sub> silica gel plates; the spots were located with UV light and developed with an iodine/silica or (1% w/v) potassium permanganate solution. Mass Spectra (MS): Electrospray (ESI) in Agilent (2006) LC/MSD-TOF mass spectrometer. High Resolution Mass Spectra (HR-MS): Electrospray (ESI) with high resolution in Agilent (2006) LC/MSD-TOF mass spectrometer. Melting points are uncorrected and were measured by Gallenkamp Melting point instrument using crystal capillaries purchased from Afora.

**1**:  $^1\text{H}$  NMR (300 MHz,  $\text{CDCl}_3$ ): 0.87 (t,  $J=6$  Hz, 6H,  $\text{CH}_3$ ); 1.25-1.32 (m, 20H,  $(\text{CH}_2)_5$ ); 1.90 (m, 4H,  $\text{N-CH}_2\text{-CH}_2$ ); 4.27 (t,  $J=7.5$  Hz, 4H,  $\text{N-CH}_2$ ); 5.64 (s, 4H,  $\text{CH}_2$ ); 7.17 (dd,  $J=6$  Hz,  $J=9$  Hz, 1H, Ar-H(5)); 7.29 (s, 2H, Im-H(4)); 7.62 (d, 2H,  $J=9$  Hz, Ar-H(4,6)); 8.13 (s, 1H, Ar-H(2)); 8.20 (t, 2H, Im-H(5)); 10.45 (s, 2H, Im-H(2)).  $^{13}\text{C}$  NMR (100 MHz,  $\text{CDCl}_3$ ): 14.2 ( $\text{CH}_3$ ); 22.7-31.8 ( $(\text{CH}_2)_6$ ); 50.4 ( $\text{N-CH}_2$ ); 52.5 ( $\text{CH}_2$ ); 121.9 (Im-C(4)); 123.7 (Im-C(5)); 130.1 (Ar-C(4,5,6)); 130.6 (Ar-C(2)); 134.9 (Ar-C(1,3))/(ImC(2)); 136.8 (Ar-C(1,3))/(ImC(2)). MS (ESI)  $m/z$ : (232.2,  $[(\text{M}-2\text{Br})/2]^{2+}$ , 100%); (351.3,  $[\text{M}-(\text{CH}_2)_7\text{-CH}_3, -2\text{Br}]^+$ , 21%); (464.4,  $[\text{M}-2\text{Br}]^+$ , 4%); (543.3,  $[\text{M}-\text{Br}]^+$ , 5%). HRMS (ESI)  $m/z$ : ( $\text{C}_{30}\text{H}_{48}\text{N}_4\text{Br}_2 - \text{Br}$ ) $^+$  calculated 543.3056, found 543.3078; ( $\text{C}_{30}\text{H}_{48}\text{N}_4\text{Br}_2 - 2\text{Br}$ ) $^{2+}$  calculated 232.1934, found 232.1941.  $R_f$ : 0.36 ( $\text{CH}_2\text{Cl}_2$ :MeOH, 9:2)

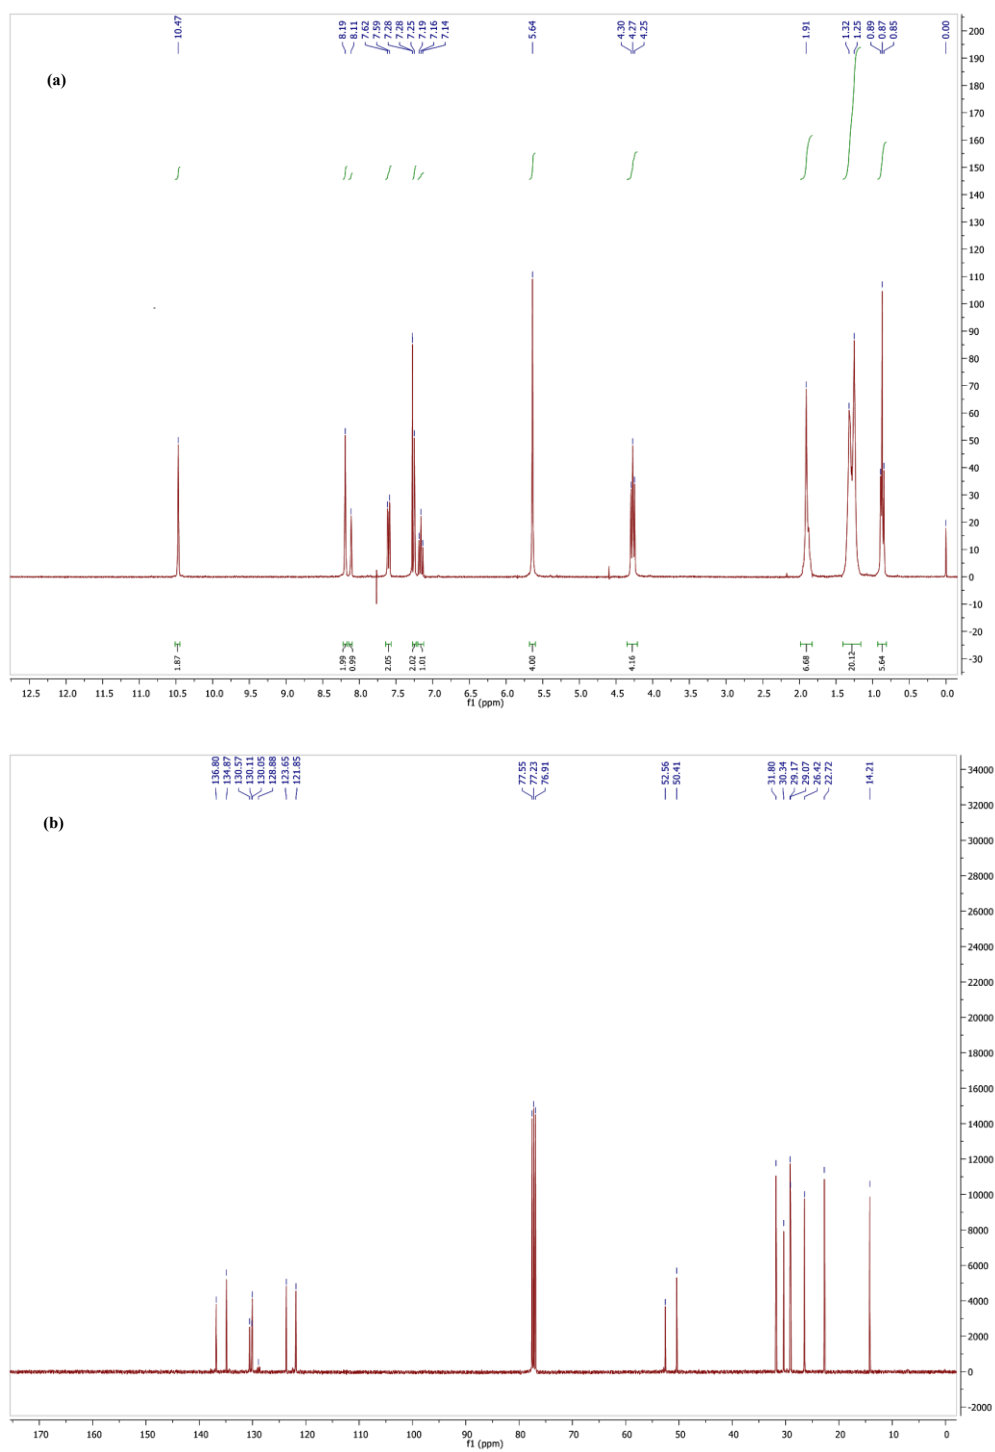

**Fig S1.** NMR spectra for **1**: (a)  $^1\text{H}$  NMR (300 MHz,  $\text{CDCl}_3$ ) and  $^{13}\text{C}$  NMR (100 MHz,  $\text{CDCl}_3$ ).

### Fluorescence emission spectra of pyrene containing surfactant solution

Fig. 2 shows an example of the experimental results for **2** by plotting the intensity as a function the wavelength for increasing concentration of surfactant (0.2 – 1.2 mM) in aqueous solution with a fixed concentration of pyrene ( $10^{-6}$  M). The fluorescence intensity was normalized by  $I_1/I_3$  ( $I_1$  and  $I_3$  correspond to the wavelengths of 373 nm and 384 nm, respectively).

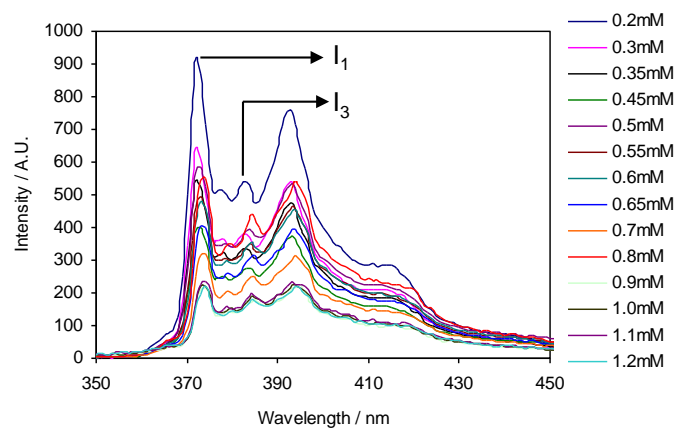

**Fig. S2** Fluorescence spectra of aqueous solutions of **2**.

SANS curve for **1**

The flat SANS curves showed in Fig. 3S suggest that surfactant molecules of **1** in 10 mM and 15 mM aqueous solutions at 25°C do not have the capability to self-assemble into aggregates.

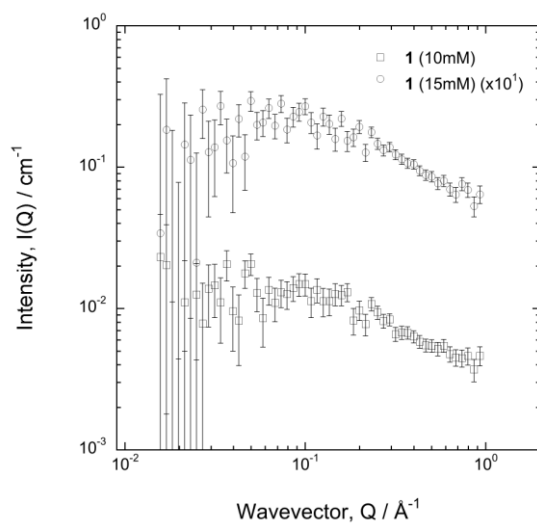

**Fig. S3** SANS curves obtained for 10 mM and 15 mM aqueous solutions containing **1**.
